# Supplementary material for: Bio-photo-Fenton-like RAFT polymerization under blue light
Source: Royal Society of Chemistry journal article supplement (doi:10.1039/d4py00593g), 2024-01-01
Supplement: d4py00593g1.pdf [file d4py00593g1.pdf]

## Supporting Information

### **Bio-photo-Fenton-like RAFT polymerization under blue light**

James L. Grace,<sup>a</sup> Greg Qiao\*<sup>a</sup>

<sup>a</sup>Polymer Science Group, Department of Chemical and Biomolecular Engineering, University of Melbourne, Parkville, VIC 3010, Australia

Email address: gregghq@unimelb.edu.au

## Method

### General procedure for studying effect of hydrogen peroxide concentration on polymerization rate.

DMA (300 mg, 3.026 mmol, 460 eq.), bis-TTC (1.86 mg, 6.579  $\mu\text{mol}$ , 1 eq.), riboflavin (0.3147 mg, 0.6579  $\mu\text{mol}$ , 0.1 eq.), and water (3 mL) were charged to a glass vial with a magnetic stir bar. Varying equivalences of hydrogen peroxide (0.5, 1, 2, 2.6 and 5 eq) were added to the vials and sealed with a rubber septum. The reaction mixture was degassed via argon sparging for 25 minutes. The vial was irradiated by a blue light LED at room temperature for 6 hours, after samples were taken for  $^1\text{H}$  NMR spectroscopy.

The sample for  $^1\text{H}$  NMR analysis was diluted with  $\text{D}_2\text{O}$ .

### Quantification of generated hydrogen peroxide ( $\text{H}_2\text{O}_2$ ).

For the determination of the yield of  $\text{H}_2\text{O}_2$ , the spectroscopic method described by Hochanadel<sup>1</sup> was used. In this method,  $\text{I}^-$  is oxidised to  $\text{I}^{3-}$  by hydrogen peroxide in a ratio 1:1, under the catalytic activity of ammonium molybdate. In details, 1 ml of each of the two solutions, A (0.4 M KI, 0.1 M NaOH, and 0.02 mM  $(\text{NH}_4)_6\text{Mo}_7\text{O}_{24}$ ) and B (0.1 M  $\text{C}_8\text{H}_5\text{KO}_4$ ), were mixed with 1 mL of a freshly irradiated sample that contained glucose/glucose oxidase, riboflavin and water, and analysed via UV/Vis spectroscopy. A molar extinction coefficient for  $\text{I}^{3-}$  of  $26400 \text{ M}^{-1} \text{ cm}^{-1}$  at 353 nm at room temperature was used.

## Results

Table SI 1 Effect of  $\text{H}_2\text{O}_2$  molar ratio on polymerization conversion as determined by  $^1\text{H}$  NMR spectroscopy.

| $\text{H}_2\text{O}_2$ Molar ratio (eq.) | Conv. (%) <sup>a</sup> |
|------------------------------------------|------------------------|
| 0.5                                      | 41                     |
| 1                                        | 39                     |
| 2                                        | 68                     |
| 2.6                                      | 92                     |
| 5                                        | 74                     |

<sup>a</sup>Monomer conversion was determined by  $^1\text{H}$  NMR spectroscopy

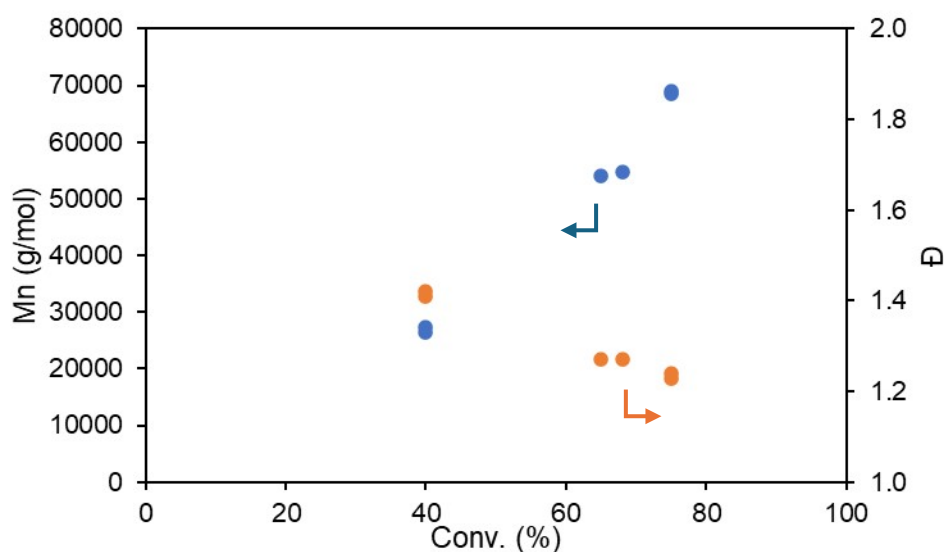

Figure SI 1 Evolution of number average molar mass ( $M_n$ ) and dispersity ( $D$ ) as a function of conversion for ON/OFF experiment.  $M_n$  values (blue points) and  $D$  values (orange points) were calculated from GPC.

Table SI 2 Characterization of the ON/OFF experiment via  $^1\text{H}$  NMR spectroscopy and GPC analysis.

| Time (min) | Conv. (%) <sup>a</sup> | $M_{n,th}$ (g/mol) <sup>b</sup> | $M_n$ (g/mol) <sup>c</sup> | $\mathcal{D}$ <sup>c</sup> |
|------------|------------------------|---------------------------------|----------------------------|----------------------------|
| 0          | 0                      | -                               | -                          | -                          |
| 60         | 40                     | 18522                           | 17804                      | 1.37                       |
| 120        | 40                     | 18522                           | 18367                      | 1.35                       |
| 180        | 65                     | 29922                           | 34667                      | 1.24                       |
| 240        | 68                     | 31290                           | 35069                      | 1.24                       |
| 300        | 75                     | 34482                           | 43356                      | 1.20                       |
| 360        | 75                     | 34482                           | 43632                      | 1.20                       |

<sup>a</sup>Conversion values were calculated from  $^1\text{H}$  NMR analysis.; <sup>b</sup>Theoretical molecular weights were calculated according to the formula:  $M_{n,th} = \text{DP} \times \text{conv.} \times \text{MW}_{\text{monomer}} + \text{MW}_{\text{RAFT agent}}$ .; <sup>c</sup>Molecular weight ( $M_n$ ) and dispersity ( $\mathcal{D}$ ) were determined by GPC analysis (DMF as eluent) calibrated to poly(methyl methacrylate) standards.

Table SI 3 Quantification of  $\text{H}_2\text{O}_2$  concentration generated by glucose/glucose oxidase system

| Conditions                                             | Abs at 353 nm | $\epsilon$ ( $\text{M}^{-1} \text{cm}^{-1}$ ) | Light path (cm) | Dilution | Conc. (mM) | Undiluted Conc. (mM) |
|--------------------------------------------------------|---------------|-----------------------------------------------|-----------------|----------|------------|----------------------|
| Glu/Gox, Sealed, Blue light, FMN                       | 0.739         | 26400                                         | 1               | 20       | 0.0280     | 0.5598               |
| Glu/Gox, open, Blue light                              | 2.674         | 26400                                         | 1               | 20       | 0.1013     | 2.0258               |
| 1.745 $\mu\text{L}$ of 30% $\text{H}_2\text{O}_2$ sol. | 2.712         | 26400                                         | 1               | -        | 0.1027     | 0.1027               |

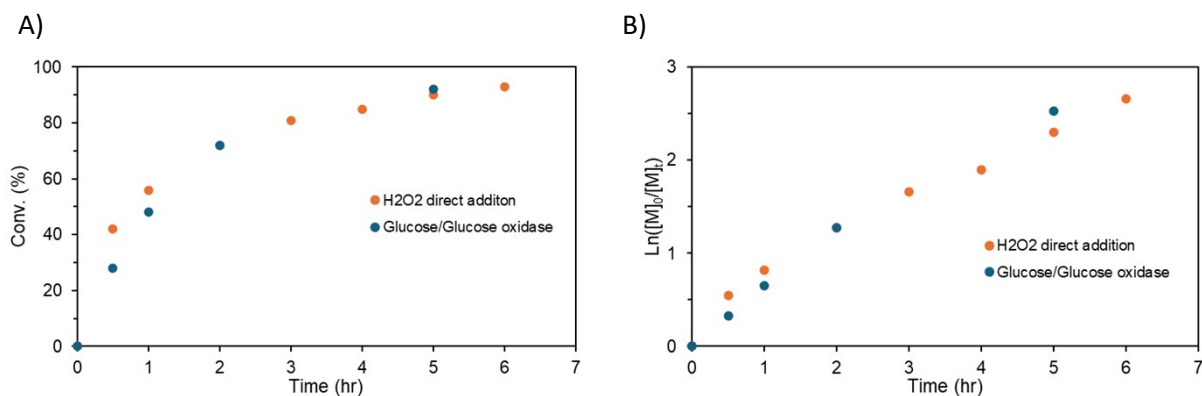

Figure SI 2 Polymerization kinetics of FMN/ $\text{H}_2\text{O}_2$  (orange) or glucose/glucose oxidase/FMN (blue) aqueous photo-RAFT polymerization of DMA. A) Conversion (%) profile of DMA photopolymerization. B) Evolution of  $\ln([M]_0/[M]_t)$  against irradiation time. Polymerization was conducted under blue light ( $\lambda = 451 \text{ nm}$ ) using a ratio of  $[\text{DMA}]/[\text{Bis-TTC}]/[\text{H}_2\text{O}_2]/[\text{Riboflavin}] = 460/1/2.6/0.1$ , or  $[\text{DMA}]/[\text{Bis-TTC}]/[\text{Riboflavin}] = 460/1/0.1$  with glucose/glucose oxidase = 0.1 M/1  $\mu\text{M}$  in 3 mL water.

## References

1. C. J. Hochanadel, *The Journal of Physical Chemistry*, 1952, **56**, 587-594.
